# Supplementary material for: The COG database: an updated version includes eukaryotes
Source: Springer Nature journal article supplement (doi:10.1186/1471-2105-4-41), 2003-09-11
Supplement: 12859_2003_91_MOESM3_ESM.pdf [file 12859_2003_91_MOESM3_ESM.pdf]

|               | <i>Arabidopsis thaliana</i> | <i>Caenorhabditis elegans</i> | <i>Drosophila melanogaster</i> | <i>Homo sapiens</i>        | <i>Sacchar. cerevisiae</i> | <i>Schizosac. pombe</i>     | <i>Enceph. cuciculi</i> |
|---------------|-----------------------------|-------------------------------|--------------------------------|----------------------------|----------------------------|-----------------------------|-------------------------|
| ◆ YGR234w     |                             |                               |                                |                            |                            |                             |                         |
| ◆ SPAC869.02c |                             |                               |                                |                            |                            |                             |                         |
| ◆ CE23430     |                             |                               |                                |                            |                            |                             |                         |
| ◆ At2g16060   | <a href="#">At2g16060</a>   | <a href="#">CE09520</a>       | <a href="#">7300077</a>        | <a href="#">Hs4885477</a>  | <a href="#">YGR234w</a>    | <a href="#">SPAC869.02c</a> | -                       |
| ◆ At3g10520   | <a href="#">At3g10520</a>   | <a href="#">CE14922</a>       |                                | <a href="#">Hs19549331</a> | <a href="#">YNL234w</a>    |                             |                         |
| ◆ Hs10864065  |                             | <a href="#">CE03233</a>       |                                | <a href="#">Hs4885397</a>  |                            |                             |                         |
| ◆ YNL234w     |                             | <a href="#">CE05911</a>       |                                | <a href="#">Hs4504353</a>  |                            |                             |                         |
| ◆ CE09520     |                             | <a href="#">CE29586</a>       |                                | <a href="#">Hs6715607</a>  |                            |                             |                         |
| ◆ CE14922     |                             | <a href="#">CE04582</a>       |                                | <a href="#">Hs4885395</a>  |                            |                             |                         |
| ◆ Hs4504349   |                             | <a href="#">CE26199</a>       |                                | <a href="#">Hs4885393</a>  |                            |                             |                         |
| ◆ Hs4504351   |                             | <a href="#">CE02514</a>       |                                | <a href="#">Hs4885397</a>  |                            |                             |                         |
| ◆ Hs4885393   |                             | <a href="#">CE02371</a>       |                                | <a href="#">Hs4504345</a>  |                            |                             |                         |
| ◆ Hs4504353   |                             | <a href="#">CE06490</a>       |                                | <a href="#">Hs4504349</a>  |                            |                             |                         |
| ◆ Hs6715607   |                             | <a href="#">CE03523</a>       |                                | <a href="#">Hs4504351</a>  |                            |                             |                         |
| ◆ Hs4885397   |                             | <a href="#">CE05316</a>       |                                | <a href="#">Hs10864065</a> |                            |                             |                         |
| ◆ Hs4504345   |                             | <a href="#">CE19039</a>       |                                |                            |                            |                             |                         |
| ◆ Hs4885395   |                             | <a href="#">CE01528</a>       |                                |                            |                            |                             |                         |
| ◆ Hs19549331  |                             | <a href="#">CE12774</a>       |                                |                            |                            |                             |                         |
| ◆ Hs4885477   |                             | <a href="#">CE21369</a>       |                                |                            |                            |                             |                         |
| ◆ CE01012     |                             | <a href="#">CE01816</a>       |                                |                            |                            |                             |                         |
| ◆ 7300077     |                             | <a href="#">CE05237</a>       |                                |                            |                            |                             |                         |
| ◆ CE05807     |                             | <a href="#">CE17437</a>       |                                |                            |                            |                             |                         |
| ◆ CE01528     |                             | <a href="#">CE23430</a>       |                                |                            |                            |                             |                         |
| ◆ CE21369     |                             | <a href="#">CE23431</a>       |                                |                            |                            |                             |                         |
| ◆ CE05316     |                             | <a href="#">CE19638</a>       |                                |                            |                            |                             |                         |
| ◆ CE29586     |                             | <a href="#">CE02137</a>       |                                |                            |                            |                             |                         |
| ◆ CE06490     |                             | <a href="#">CE05807</a>       |                                |                            |                            |                             |                         |
| ◆ CE05237     |                             | <a href="#">CE01012</a>       |                                |                            |                            |                             |                         |
| ◆ CE01816     |                             |                               |                                |                            |                            |                             |                         |
| ◆ CE04582     |                             |                               |                                |                            |                            |                             |                         |
| ◆ CE12774     |                             |                               |                                |                            |                            |                             |                         |
| ◆ CE02371     |                             |                               |                                |                            |                            |                             |                         |
| ◆ CE19039     |                             |                               |                                |                            |                            |                             |                         |
| ◆ CE02137     |                             |                               |                                |                            |                            |                             |                         |
| ◆ CE23431     |                             |                               |                                |                            |                            |                             |                         |
| ◆ CE26199     |                             |                               |                                |                            |                            |                             |                         |
| ◆ CE05911     |                             |                               |                                |                            |                            |                             |                         |
| ◆ CE03233     |                             |                               |                                |                            |                            |                             |                         |
| ◆ CE17437     |                             |                               |                                |                            |                            |                             |                         |
| ◆ CE03523     |                             |                               |                                |                            |                            |                             |                         |
| ◆ CE02514     |                             |                               |                                |                            |                            |                             |                         |
| ◆ CE19638     |                             |                               |                                |                            |                            |                             |                         |
