# Supplementary figures and images for: The COG database: an updated version includes eukaryotes
Source: Springer Nature journal article supplement (doi:10.1186/1471-2105-4-41), 2003-09-11

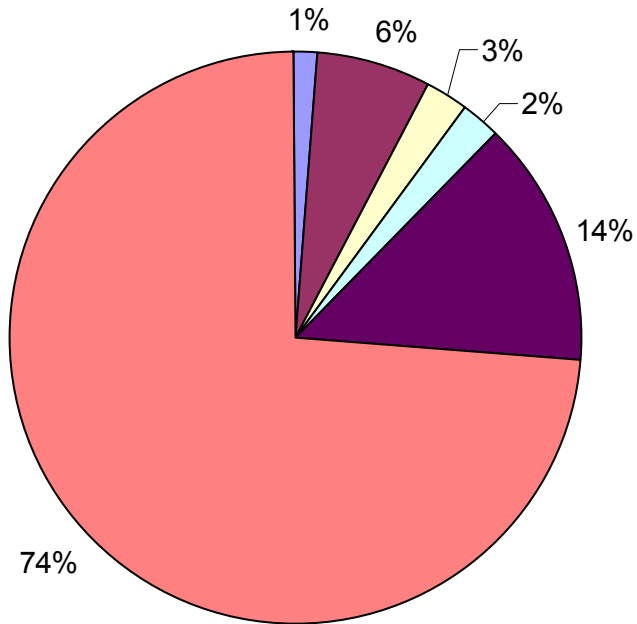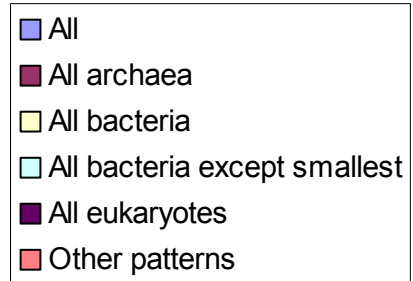

Supplement: 12859_2003_91_MOESM1_ESM.pdf [file 12859_2003_91_MOESM1_ESM.pdf]

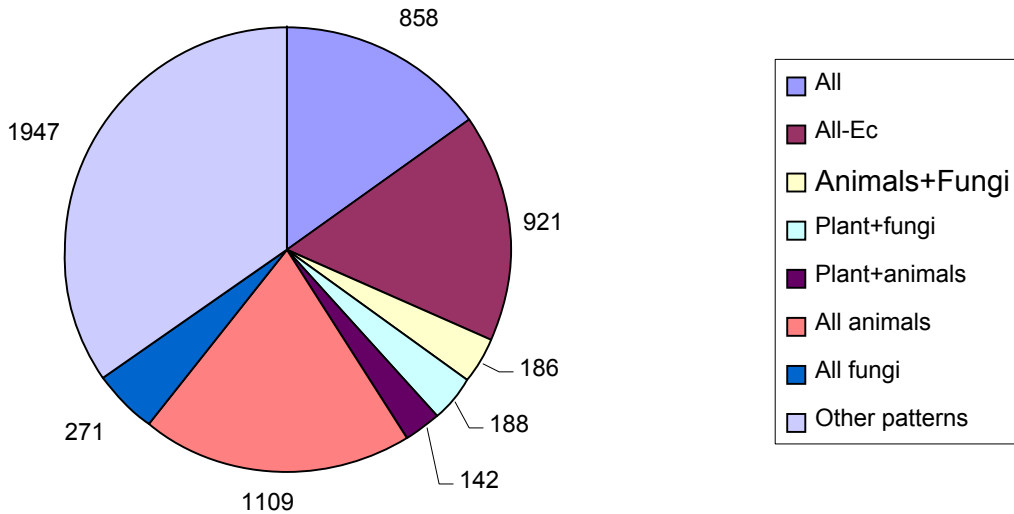

Supplement: 12859_2003_91_MOESM2_ESM.pdf [file 12859_2003_91_MOESM2_ESM.pdf]

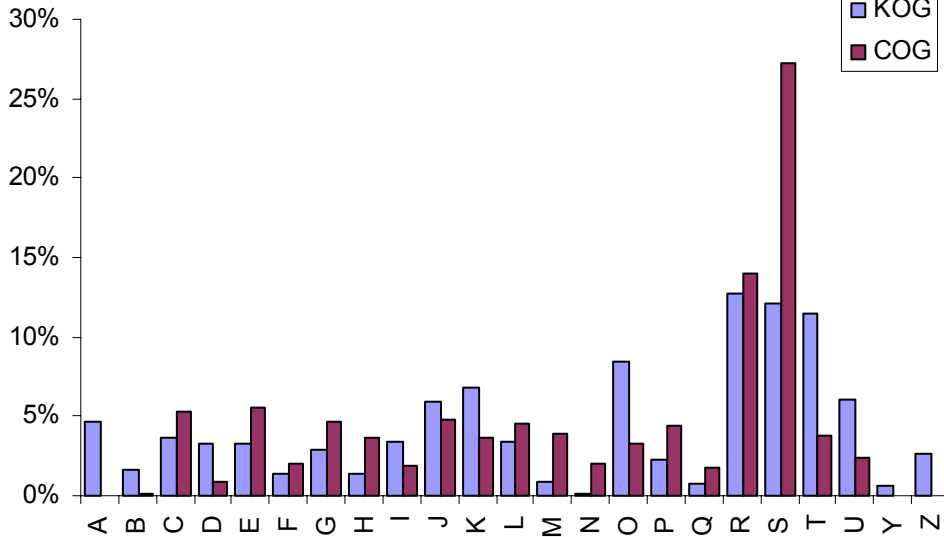

Supplement: 12859_2003_91_MOESM4_ESM.pdf [file 12859_2003_91_MOESM4_ESM.pdf]
